# Supplementary material for: Long-Term Acclimation to Different Thermal Regimes Affects Molecular Responses to Heat Stress in a Freshwater Clam Corbicula Fluminea
Source: PubMed Central journal article supplement (PMC5171794; doi:10.1038/srep39476), 2016-12-20
Supplement: srep39476-s1.pdf [file srep39476-s1.pdf]

**Supplementary information to the manuscript “LONG-TERM ACCLIMATION TO DIFFERENT THERMAL REGIMES AFFECTS MOLECULAR RESPONSES TO HEAT STRESS IN A FRESHWATER CLAM *CORBICULA FLUMINEA*” by Halina I. Falfushynska, Tuan Phan, and Inna M. Sokolova**

**Supplementary Figure 1.** Representative images of Western Blot (A-D) and dot-blot (E) analyses of tissue extracts from *C. fluminea* using eiF2 $\alpha$  (A), p-eiF2 $\alpha$  (B), AMPK $\alpha$  (C), HIF-1 $\alpha$  (D), and ubiquitin (E) antibodies. The first lane on images A-D represents a molecular weight marker. Western blot for HIF-1 $\alpha$  (D) yielded two bands corresponding to the intact HIF-1 $\alpha$  (~100 kDa) and its degradation products (the lower band of ~70 kDa); only the upper band was quantified.

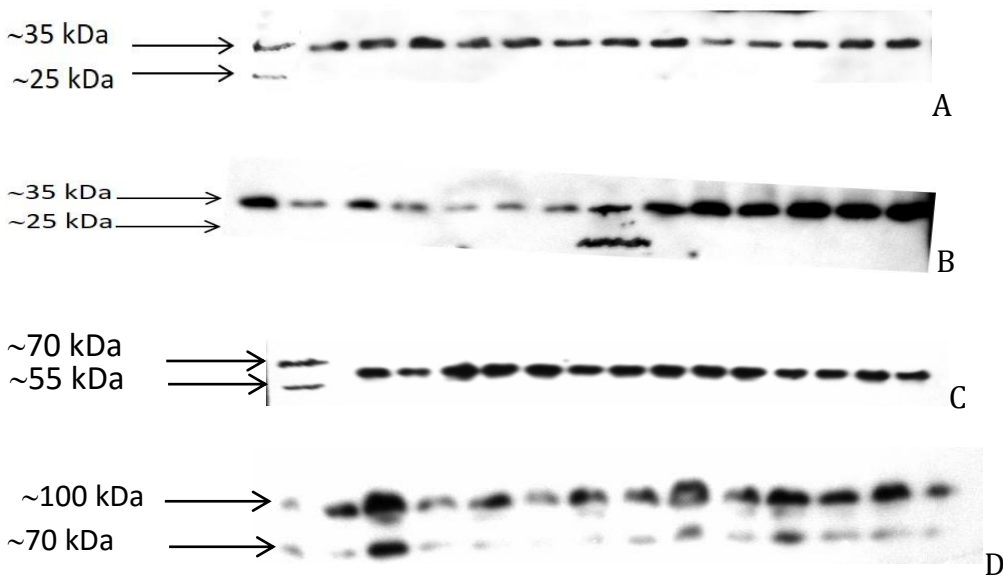

E

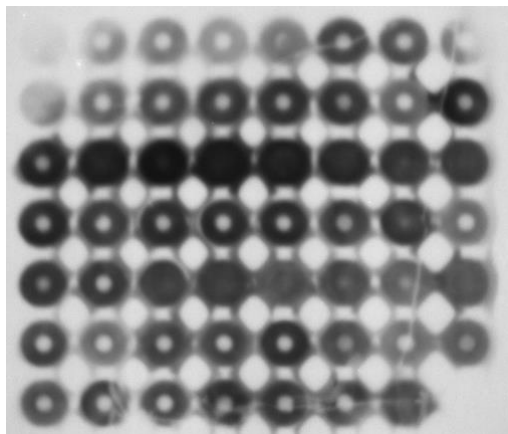



|                  |        |        |        |        |        |        |        |        |        |        |        |        |        |        |        |        |        |        |        |        |        |        |        |        |        |        |        |        |
|------------------|--------|--------|--------|--------|--------|--------|--------|--------|--------|--------|--------|--------|--------|--------|--------|--------|--------|--------|--------|--------|--------|--------|--------|--------|--------|--------|--------|--------|
|                  | p=.015 | p=.101 | p=.036 | p=.055 | p=.083 | p=.056 | p=.001 | p=.726 | p=.106 | p=.120 | p=.001 | p=.120 | p=.642 | p=.010 | p=.254 | p=.111 | p=.556 | p=.016 | p=---  | p=.001 | p=.460 | p=.020 | p=.669 | p=.000 | p=.026 | p=.249 | p=.033 | p=.533 |
| <b>PC</b>        | .2271  | -.0653 | .1280  | .2733  | -.1257 | .1698  | -.2636 | -.1574 | -.1782 | -.2336 | -.0925 | -.2336 | -.0033 | -.1552 | .4573  | .4457  | .3083  | .6302  | .3309  | 1.0000 | .0544  | -.3726 | -.2512 | .3711  | .0582  | .2177  | .1624  | .2518  |
|                  | p=.030 | p=.538 | p=.227 | p=.009 | p=.235 | p=.108 | p=.012 | p=.136 | p=.091 | p=.026 | p=.383 | p=.026 | p=.975 | p=.142 | p=.000 | p=.000 | p=.003 | p=.000 | p=.001 | p=---  | p=.608 | p=.000 | p=.016 | p=.000 | p=.584 | p=.038 | p=.124 | p=.016 |
| <b>eiF-2a</b>    | .3508  | -.2244 | -.3233 | .1030  | -.0020 | -.0791 | -.2124 | .0946  | -.3624 | .1290  | .0704  | .1290  | .3511  | -.0340 | .3448  | .2740  | .2165  | .1688  | .0785  | .0544  | 1.0000 | .5301  | .3012  | .1534  | -.0023 | -.0978 | .1644  | -.0583 |
|                  | p=.001 | p=.033 | p=.002 | p=.332 | p=.985 | p=.456 | p=.043 | p=.372 | p=.000 | p=.223 | p=.507 | p=.223 | p=.001 | p=.749 | p=.001 | p=.009 | p=.039 | p=.110 | p=.460 | p=.608 | p=---  | p=.000 | p=.004 | p=.147 | p=.983 | p=.357 | p=.119 | p=.583 |
| <b>AMPK</b>      | .1119  | -.1766 | -.2962 | -.2551 | .1422  | -.1476 | -.0274 | -.0597 | .0070  | .1355  | .0510  | .1355  | .0848  | .1276  | -.0117 | -.0085 | -.0199 | -.2558 | -.2438 | -.3726 | .5301  | 1.0000 | .0592  | -.1054 | .0269  | -.2143 | .2080  | -.1252 |
|                  | p=.291 | p=.094 | p=.004 | p=.015 | p=.179 | p=.163 | p=.797 | p=.574 | p=.948 | p=.200 | p=.631 | p=.200 | p=.424 | p=.228 | p=.912 | p=.937 | p=.851 | p=.014 | p=.020 | p=.000 | p=.000 | p=---  | p=.578 | p=.320 | p=.800 | p=.041 | p=.048 | p=.237 |
| <b>p-eiF2a</b>   | -.0559 | -.0797 | -.2300 | .0546  | .0347  | -.0935 | .0274  | .0613  | -.0488 | .1003  | .1448  | .1003  | .0836  | .1313  | -.1731 | -.1619 | -.1839 | -.4187 | -.0455 | -.2512 | .3012  | .0592  | 1.0000 | -.3433 | -.3680 | -.1876 | -.0209 | -.0912 |
|                  | p=.598 | p=.453 | p=.028 | p=.607 | p=.744 | p=.378 | p=.796 | p=.563 | p=.646 | p=.344 | p=.171 | p=.344 | p=.431 | p=.215 | p=.101 | p=.125 | p=.081 | p=.000 | p=.669 | p=.016 | p=.004 | p=.578 | p=---  | p=.001 | p=.000 | p=.075 | p=.844 | p=.390 |
| <b>HIF-1a</b>    | .3600  | .2654  | .3360  | .3626  | .0427  | .2340  | -.1179 | .3210  | -.0910 | -.0027 | -.0116 | -.0027 | .1974  | -.1089 | .5172  | .4014  | .4639  | .5936  | .4070  | .3711  | .1534  | -.1054 | -.3433 | 1.0000 | .1098  | .1655  | .0544  | .2859  |
|                  | p=.000 | p=.011 | p=.001 | p=.000 | p=.688 | p=.026 | p=.266 | p=.002 | p=.391 | p=.979 | p=.913 | p=.979 | p=.061 | p=.304 | p=.000 | p=.000 | p=.000 | p=.000 | p=.000 | p=.000 | p=.147 | p=.320 | p=.001 | p=---  | p=.300 | p=.117 | p=.609 | p=.006 |
| <b>Ubiquitin</b> | .1815  | -.1809 | -.0473 | -.0382 | -.0130 | -.1650 | -.0026 | .0322  | -.1320 | .0631  | .0339  | .0631  | .2245  | -.2666 | .1019  | .0579  | .1908  | .1822  | -.2330 | .0582  | -.0023 | .0269  | -.3680 | .1098  | 1.0000 | .1434  | .1247  | .1125  |
|                  | p=.085 | p=.086 | p=.656 | p=.719 | p=.903 | p=.118 | p=.980 | p=.762 | p=.212 | p=.552 | p=.750 | p=.552 | p=.032 | p=.011 | p=.337 | p=.585 | p=.070 | p=.084 | p=.026 | p=.584 | p=.983 | p=.800 | p=.000 | p=.300 | p=---  | p=.175 | p=.239 | p=.289 |
| <b>PK</b>        | .0526  | .0408  | .1129  | .1292  | -.0642 | .0740  | -.0161 | .0145  | .0324  | -.0855 | -.0349 | -.0855 | -.0022 | -.1285 | .1330  | .1441  | .0930  | .1792  | .1220  | .2177  | -.0978 | -.2143 | -.1876 | .1655  | .1434  | 1.0000 | .1677  | .4047  |
|                  | p=.621 | p=.701 | p=.287 | p=.222 | p=.545 | p=.486 | p=.879 | p=.892 | p=.760 | p=.420 | p=.743 | p=.420 | p=.984 | p=.225 | p=.209 | p=.173 | p=.381 | p=.089 | p=.249 | p=.038 | p=.357 | p=.041 | p=.075 | p=.117 | p=.175 | p=---  | p=.112 | p=.000 |
| <b>PEPCK</b>     | .3733  | -.1545 | -.0638 | .0499  | -.0309 | -.0092 | -.0209 | -.0327 | .0306  | .0150  | .1289  | .0150  | -.0039 | -.1143 | .1341  | .0822  | .4542  | .1937  | -.2234 | .1624  | .1644  | .2080  | -.0209 | .0544  | .1247  | .1677  | 1.0000 | .4167  |
|                  | p=.000 | p=.144 | p=.548 | p=.639 | p=.771 | p=.931 | p=.844 | p=.758 | p=.773 | p=.888 | p=.223 | p=.888 | p=.971 | p=.281 | p=.205 | p=.438 | p=.000 | p=.066 | p=.033 | p=.124 | p=.119 | p=.048 | p=.844 | p=.609 | p=.239 | p=.112 | p=---  | p=.000 |
| <b>LDH</b>       | .2380  | .0547  | .1345  | .0693  | .0703  | .2012  | -.0070 | .0548  | .1160  | -.0106 | .0880  | -.0106 | -.0047 | -.1827 | .2366  | .3045  | .2772  | .3034  | .0661  | .2518  | -.0583 | -.1252 | -.0912 | .2859  | .1125  | .4047  | .4167  | 1.0000 |
|                  | p=.023 | p=.606 | p=.204 | p=.514 | p=.508 | p=.056 | p=.947 | p=.606 | p=.274 | p=.921 | p=.407 | p=.921 | p=.964 | p=.083 | p=.024 | p=.003 | p=.008 | p=.003 | p=.533 | p=.016 | p=.583 | p=.237 | p=.390 | p=.006 | p=.289 | p=.000 | p=.000 | p=---  |
